# Supplementary material for: Design, Synthesis and Evaluation of Fused Bicyclo[2.2.2]octene as a Potential Core Scaffold for the Non-Covalent Inhibitors of SARS-CoV-2 3CLpro Main Protease
Source: MDPI journal article supplement (doi:10.3390/ph15050539), 2022-04-27

## SUPPLEMENTARY INFORMATION:

### Design, synthesis and evaluation of fused bicyclo[2.2.2]octene as a potential core scaffold for the non-covalent inhibitors of SARS-COV-2 3CL<sup>pro</sup> main protease

Barbara Herlah<sup>a,b</sup>, Andrej Hoivik<sup>c</sup>, Luka Jamšek<sup>c</sup>, Katja Valjavec<sup>a</sup>, Norio Yamamoto<sup>d</sup>, Tyuji Hoshino<sup>e</sup>, Krištof Kranjc<sup>c\*</sup>, Andrej Perdih<sup>a,b\*</sup>

*<sup>a</sup>National Institute of Chemistry, Hajdrihova ulica 19, SI-1000 Ljubljana, Slovenia*

*<sup>b</sup>Faculty of Pharmacy, University of Ljubljana, Aškerčeva 7, SI-1000 Ljubljana, Slovenia*

*<sup>c</sup>Faculty of Chemistry and Chemical Technology, University of Ljubljana, Večna pot 113, SI-1000 Ljubljana, Slovenia*

*<sup>d</sup> Department of Microbiology, Tokai University School of Medicine, 143 Shimokasuya, Isehara, Kanagawa 259-1193, Japan*

*<sup>e</sup> Graduate School of Pharmaceutical Sciences, Chiba University, 1-8-1 Inohana, Chuo-ku, Chiba 260-8675, Japan*

#### \* Corresponding authors:

Krištof Kranjc: [kristof.kranjc@fkkt.uni-lj.si](mailto:kristof.kranjc@fkkt.uni-lj.si)

Andrej Perdih: [andrej.perdih@ki.si](mailto:andrej.perdih@ki.si)

## 1. Molecular interaction fields (MIFs) in the SARS-Cov-2 3CL<sup>pro</sup> main protease active site

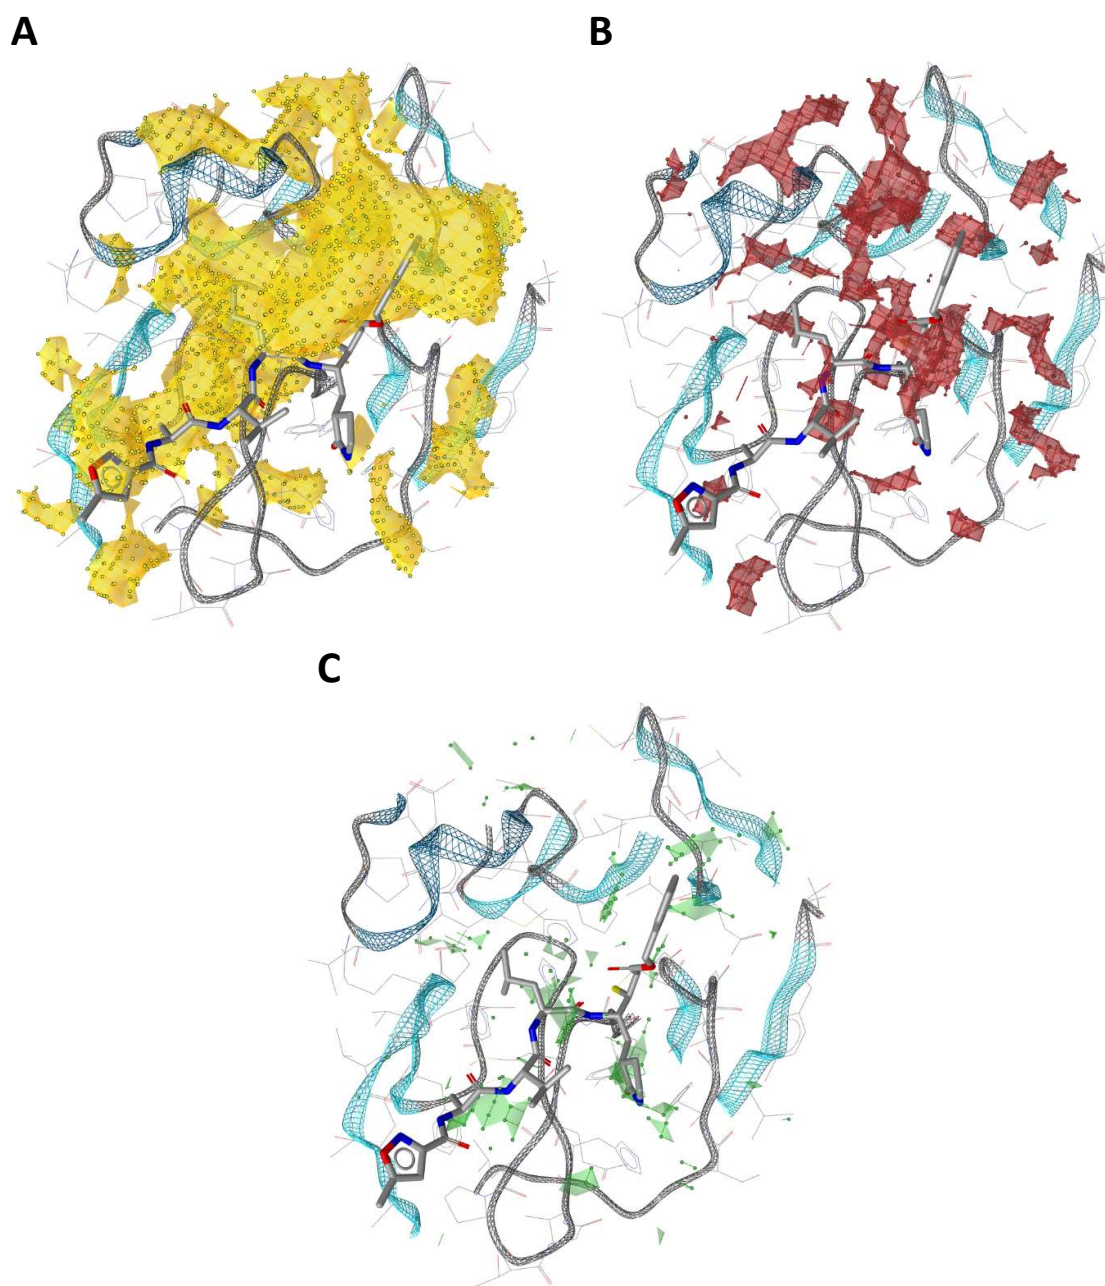

**Figure S1.** Sars-Cov-2 3CL<sup>pro</sup> Main Protease. Calculated molecular interaction fields using hydrophobic ((A); yellow), hydrogen bond acceptor ((B); red) and hydrogen bond donor ((C); green) probes, with the bound ligand N3 shown (PBD: 6LU7).

## 2. Molecular docking calculations of HIV-1 protease inhibitors

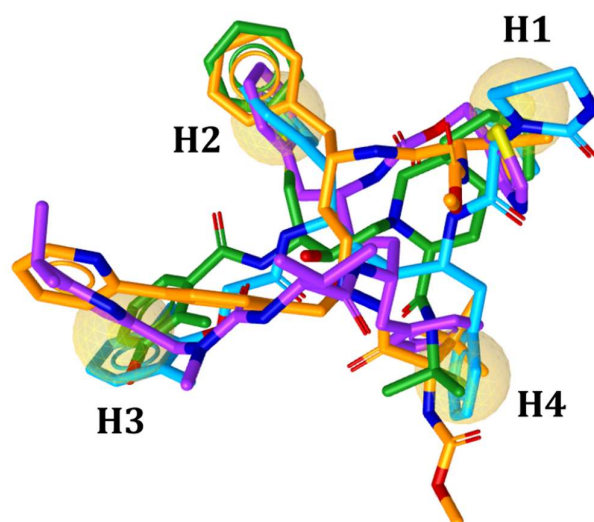

**Figure S2.** Alignment of docked conformations of HIV-1 protease inhibitors atazanavir (orange), lopinavir (light blue), nelfinavir (green) and ritonavir (violet). The compounds contain four hydrophobic moieties that can fit into four sub-pockets of the 3CL<sup>pro</sup> active site (PDB: 6LU7).

## 3. Ligand docking position and ligand movement during molecular simulation

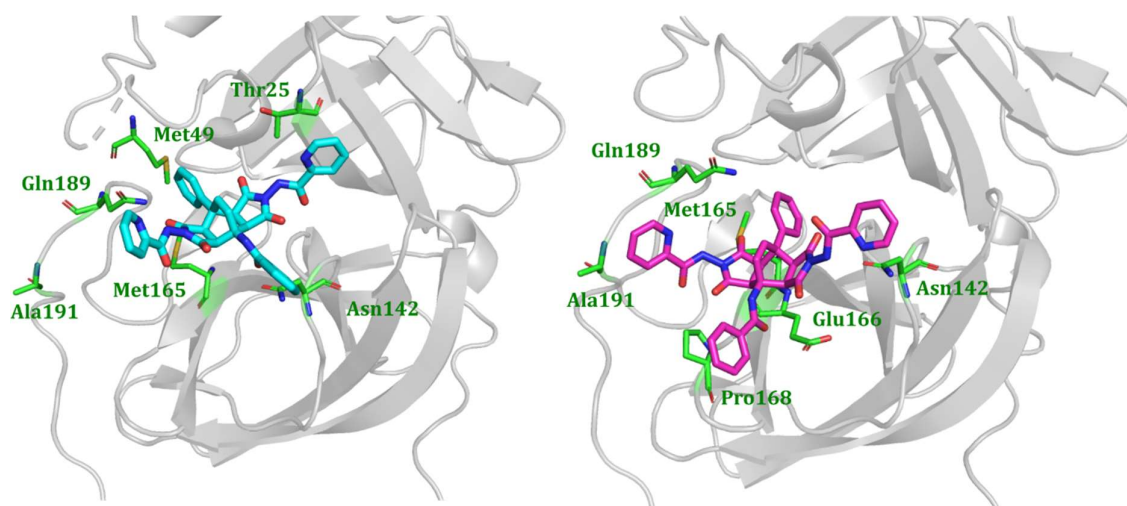

**Figure S3.** Ligand shift during the molecular dynamics simulation (left) Ligand **11a** in its initial docked position located between domains I and II of 3CL<sup>pro</sup>, (right) Shifted position of **11a** towards the 3CL<sup>pro</sup> domain II after the 120 ns MD mark. (PDB: 6LU7) .

#### 4. Comparison with x-ray covalent inhibitor

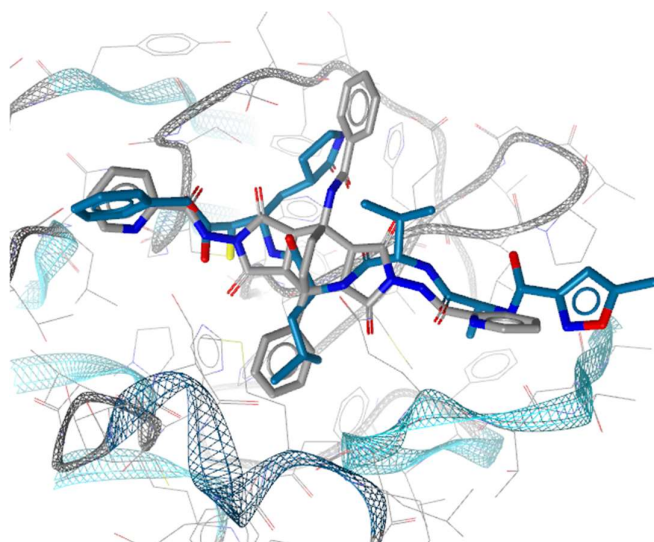

**Figure S4.** Comparison of the experimental conformation of covalent inhibitor bound in the 3CL<sup>pro</sup> X-ray structure and docked position of the ligand **11a** (PDB: 6LU7) .

#### 5. Analysis of molecular dynamics simulation

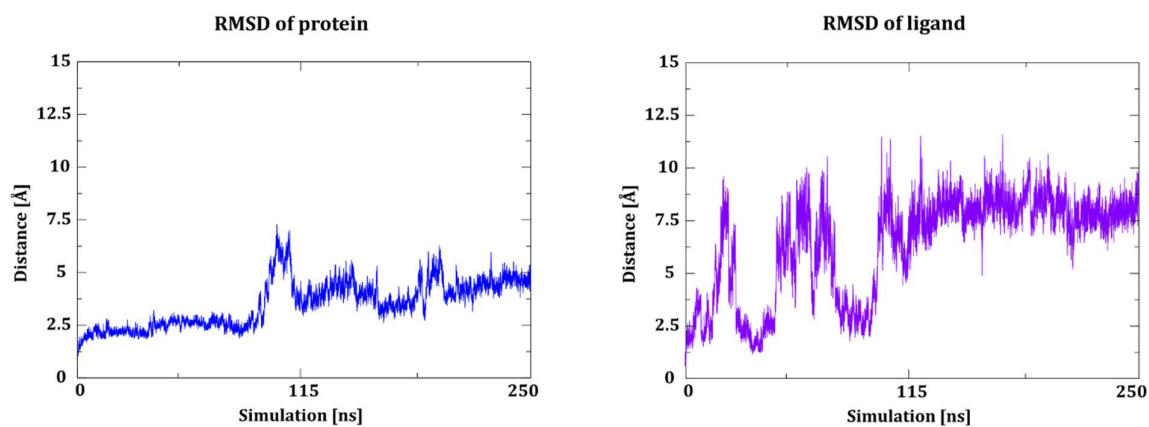

**Figure S5.** (left) Time-dependent RMSD of the 3CL<sup>pro</sup> protein (Cα atoms) (right), Time-dependent RMSD of the ligand **11a**.

## 6. Screening of SARS-CoV-2 3CL<sup>pro</sup> main protease inhibition

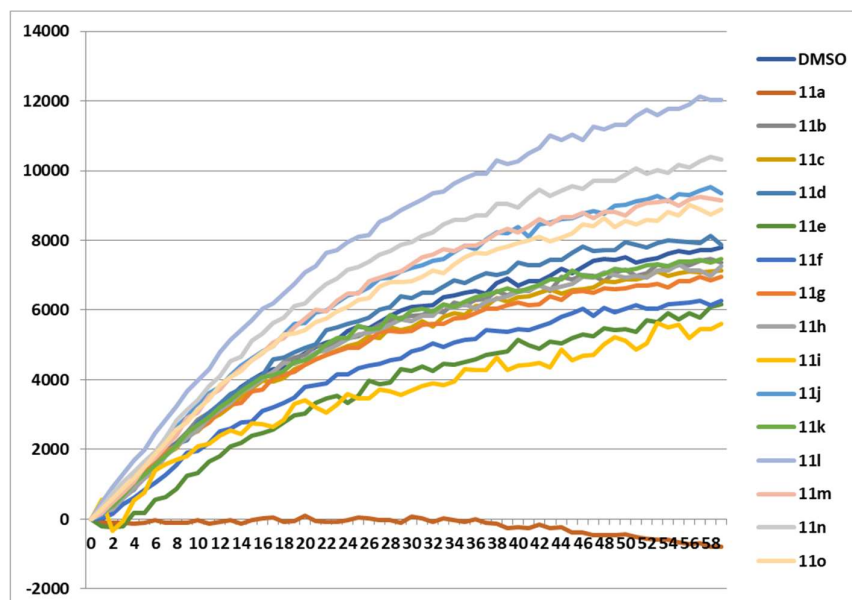

**Figure S6.** Experiments with 3CL<sup>pro</sup> protease **3CL(+)** fluorescence intensity on y-axis is calculated from the value of  $F(t) - F(0)$ . 64  $\mu$ M concentration of bicyclo[2.2.2]octenes **11a–o** is used and x-axis is time in minutes.

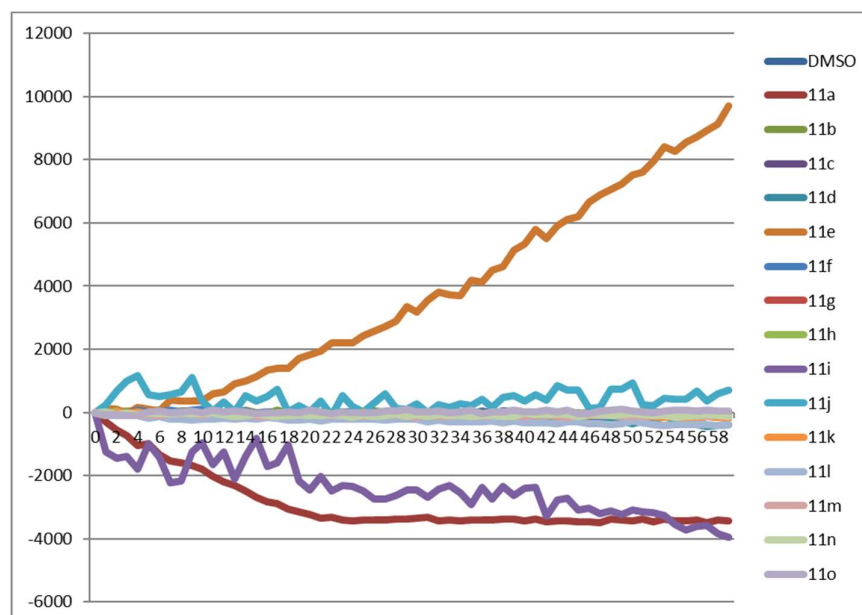

**Figure S7.** Experiments without 3CL<sup>pro</sup> protease **3CL(-)** Background fluorescence intensity (y-axis) 64  $\mu$ M concentration of bicyclo[2.2.2]octenes **11a–o** is used and x-axis is time in minutes.

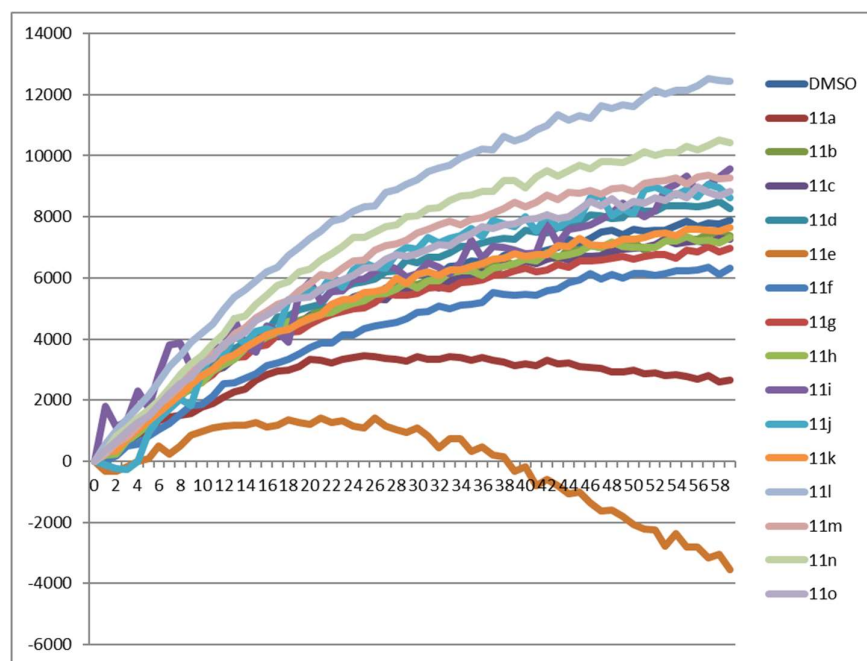

**Figure S8.** Data showing the difference between 3CL(+) and 3CL(-) 64 μM concentration of bicyclo[2.2.2]octenes **11a–o** is used and x-axis is time in minutes.

## 7. Partial charges and atom types of the simulated compound 11a

**Table S1:** Atom types and partial atomic charges for compound **11x** from the General Amber Force Field (gaff).

| 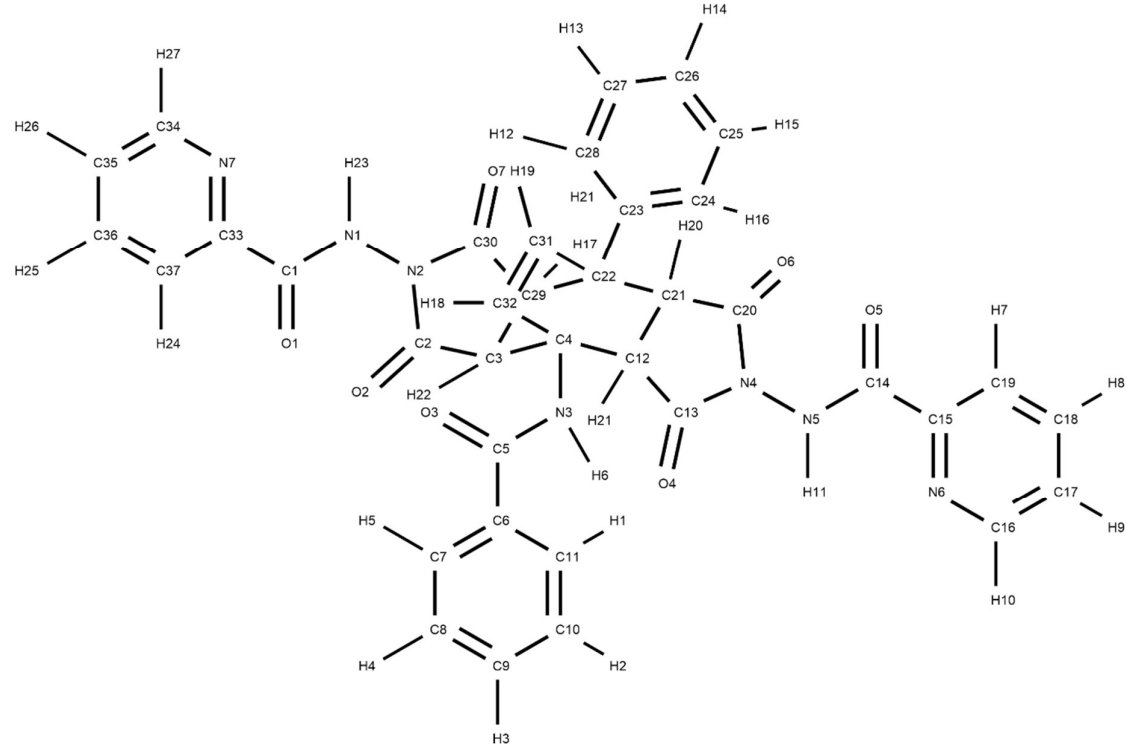 |      |          |      |      |          |      |      |          |
|-------------------------------------------------------------------------------------|------|----------|------|------|----------|------|------|----------|
| Name                                                                                | Type | q        | Name | Type | q        | Name | Type | q        |
| C10                                                                                 | ca   | -0,15539 | C1   | c    | 0,650584 | H14  | ha   | 0,12667  |
| C11                                                                                 | ca   | -0,09455 | O1   | o    | -0,56292 | H15  | ha   | 0,131839 |
| H1                                                                                  | ha   | 0,141117 | C33  | ca   | 0,395204 | H16  | ha   | 0,148091 |
| H2                                                                                  | ha   | 0,136021 | N7   | nb   | -0,59114 | C21  | c3   | -0,34489 |
| C9                                                                                  | ca   | -0,08345 | C34  | ca   | 0,35777  | C20  | c    | 0,695319 |
| H3                                                                                  | ha   | 0,126235 | C35  | ca   | -0,38728 | O6   | o    | -0,52909 |
| C8                                                                                  | ca   | -0,15539 | C36  | ca   | 0,134943 | H20  | hc   | 0,077115 |
| H4                                                                                  | ha   | 0,136021 | C37  | ca   | -0,36656 | C12  | c3   | -0,05793 |
| C7                                                                                  | ca   | -0,09455 | H24  | ha   | 0,176752 | H21  | hc   | 0,122113 |
| H5                                                                                  | ha   | 0,141117 | H25  | ha   | 0,10953  | C13  | c    | 0,550358 |

|            |    |          |            |    |          |            |    |          |
|------------|----|----------|------------|----|----------|------------|----|----------|
| <b>C6</b>  | ca | -0,1197  | <b>H26</b> | ha | 0,173901 | <b>O4</b>  | o  | -0,50033 |
| <b>C5</b>  | c  | 0,82655  | <b>H27</b> | h4 | 0,056608 | <b>N4</b>  | n  | -0,08768 |
| <b>O3</b>  | o  | -0,60723 | <b>H23</b> | hn | 0,340706 | <b>N5</b>  | n  | -0,56424 |
| <b>N3</b>  | n  | -0,8271  | <b>C30</b> | c  | 0,695319 | <b>H11</b> | hn | 0,340706 |
| <b>H6</b>  | hn | 0,324279 | <b>O7</b>  | o  | -0,52909 | <b>C14</b> | c  | 0,650584 |
| <b>C4</b>  | c3 | 0,454682 | <b>C29</b> | c3 | -0,34489 | <b>O5</b>  | o  | -0,56292 |
| <b>C32</b> | c2 | -0,28834 | <b>H17</b> | hc | 0,077115 | <b>C15</b> | ca | 0,395204 |
| <b>C31</b> | c2 | -0,30281 | <b>C22</b> | c3 | 0,38365  | <b>N6</b>  | nb | -0,59114 |
| <b>H19</b> | ha | 0,160165 | <b>C23</b> | ca | 0,013663 | <b>C16</b> | ca | 0,35777  |
| <b>H18</b> | ha | 0,219125 | <b>C24</b> | ca | -0,17875 | <b>H10</b> | h4 | 0,056608 |
| <b>C3</b>  | c3 | -0,05793 | <b>C25</b> | ca | -0,1207  | <b>C17</b> | ca | -0,38728 |
| <b>H22</b> | hc | 0,122113 | <b>C26</b> | ca | -0,11945 | <b>H9</b>  | ha | 0,173901 |
| <b>C2</b>  | c  | 0,550358 | <b>C27</b> | ca | -0,1207  | <b>C18</b> | ca | 0,134943 |
| <b>O2</b>  | o  | -0,50033 | <b>C28</b> | ca | -0,17875 | <b>H8</b>  | ha | 0,10953  |
| <b>N2</b>  | n  | -0,08768 | <b>H12</b> | ha | 0,148091 | <b>C19</b> | ca | -0,36656 |
| <b>N1</b>  | n  | -0,56424 | <b>H13</b> | ha | 0,131839 | <b>H7</b>  | ha | 0,176752 |

## 8. Selected examples of $^1\text{H}$ and $^{13}\text{C}$ NMR spectra: compounds 11a and 11e

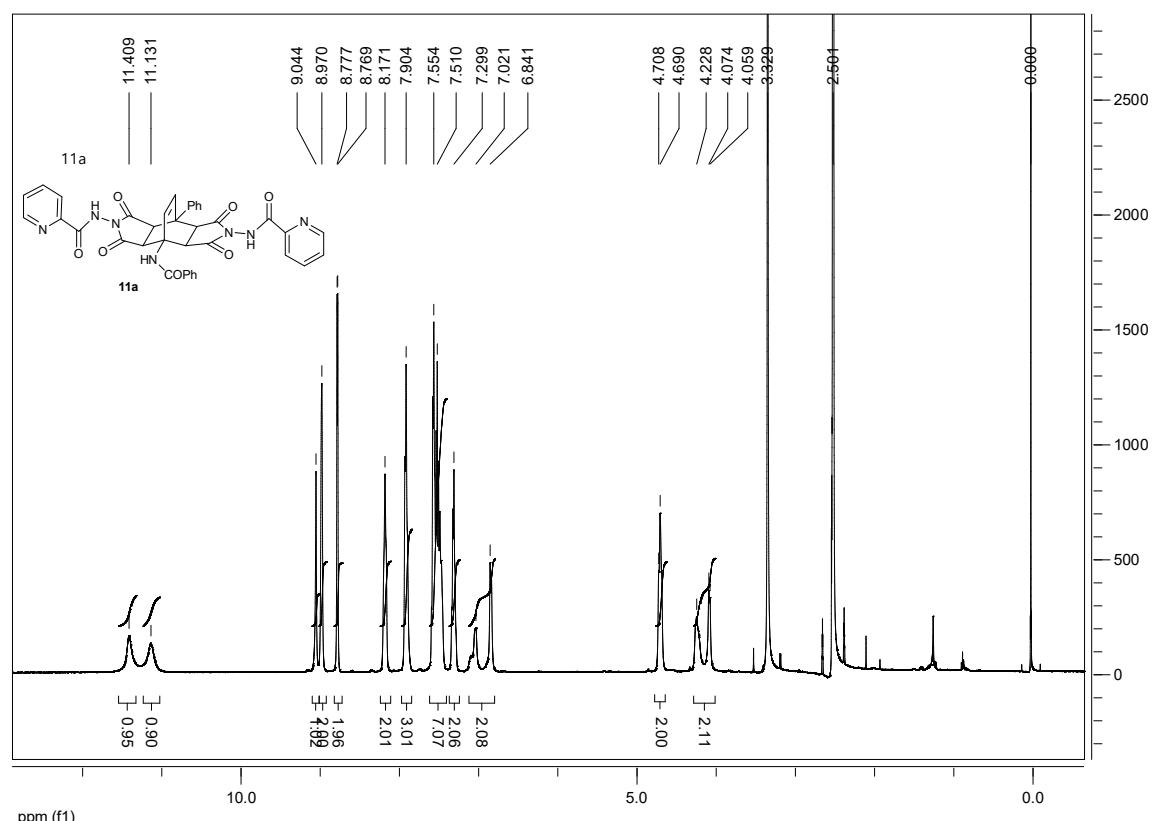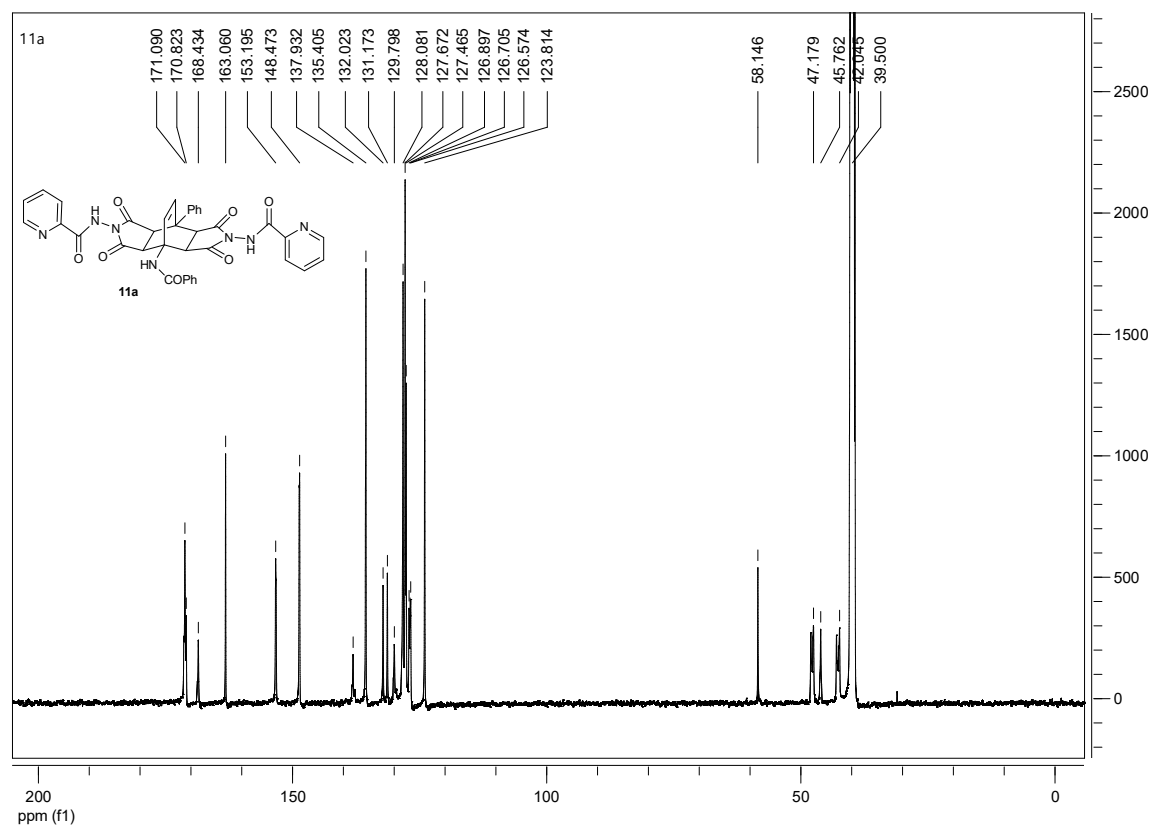

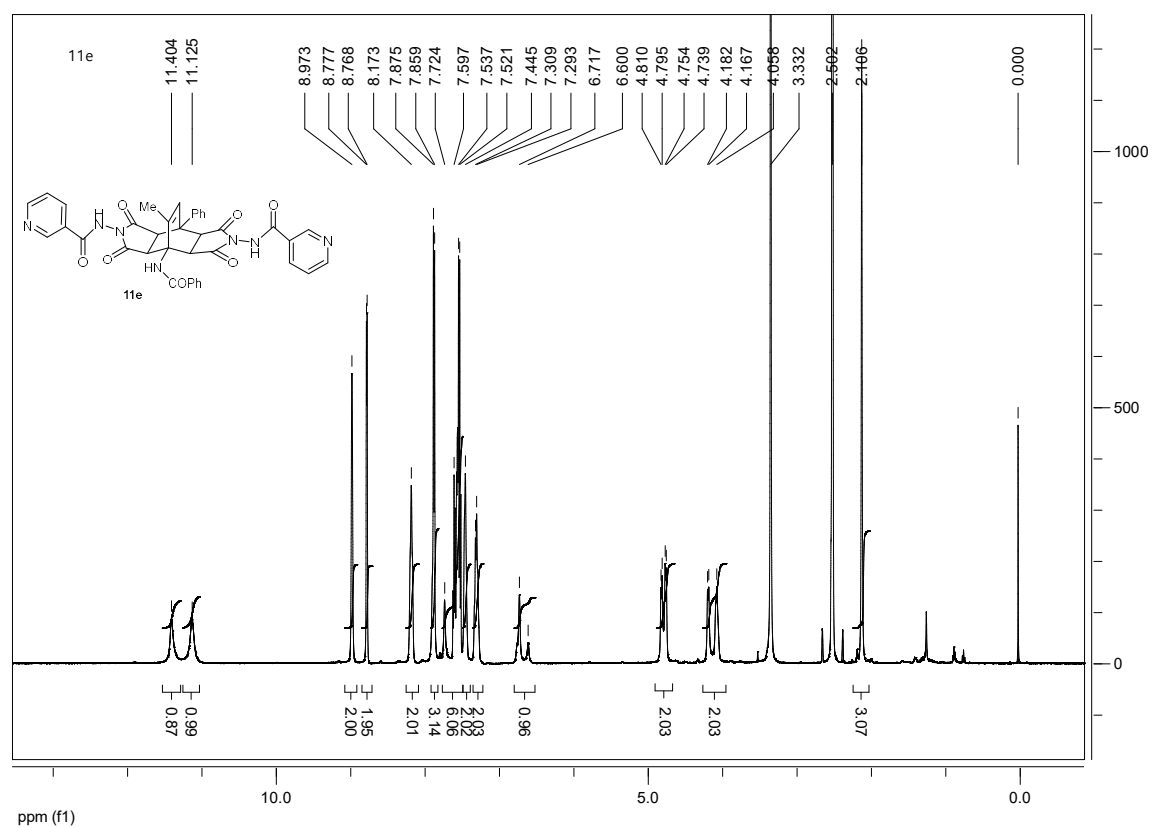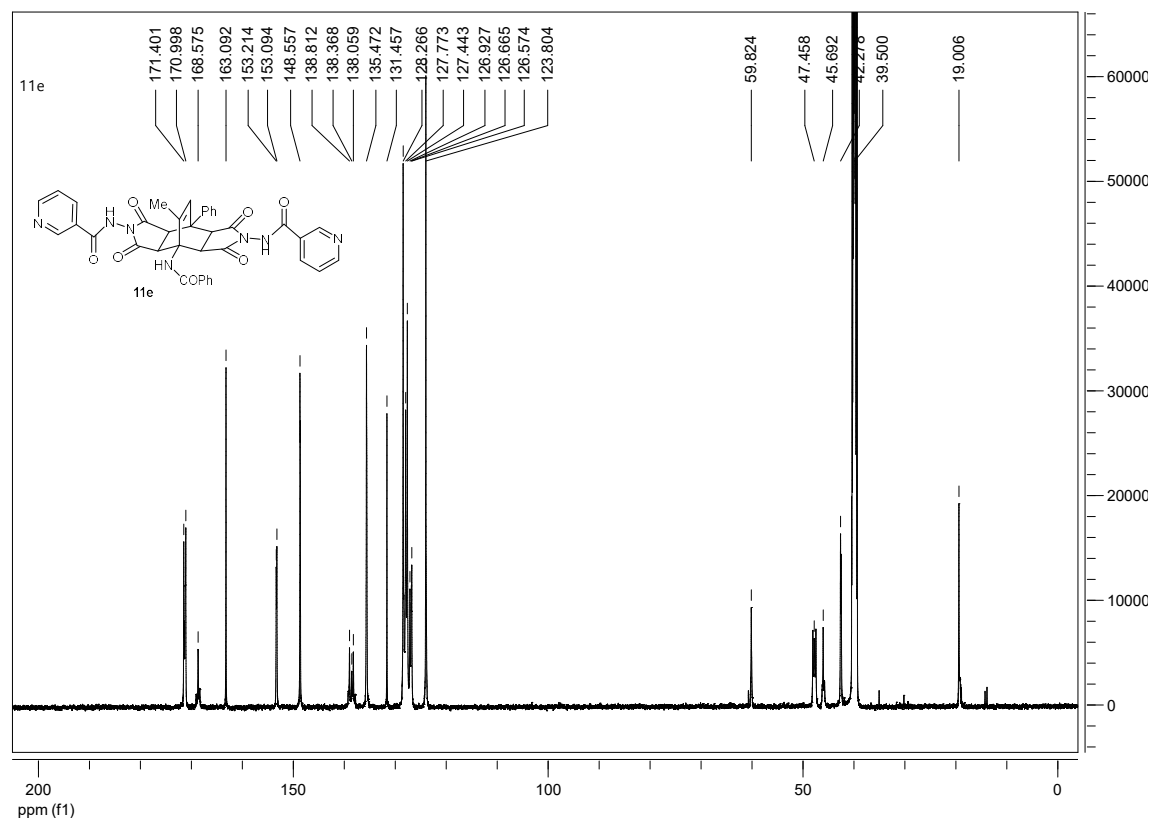

Supplement: s1 [file s1]
